# Supplementary material for: Diffusive and Metabolic Constraints to Photosynthesis in Quinoa during Drought and Salt Stress
Source: PubMed Central journal article supplement (PMC5750625; doi:10.3390/plants6040049), 2017-10-17
Supplement: plants-06-00049-s001.pdf [file plants-06-00049-s001.pdf]

# Supplementary Materials: Diffusive and Metabolic Constraints to Photosynthesis in Quinoa during Drought and Salt Stress

Dilek Killi and Matthew Haworth

**Table S1:** Chlorophyll *a* fluorescence parameters and formulas used in the fluorescence transient analysis.

| Parameters       | Formulas and Definition                                                                                                                                                                                                                                                                                                                                                                                                                                                                                                                                                                                                                                                                                                                                                                                                                    |
|------------------|--------------------------------------------------------------------------------------------------------------------------------------------------------------------------------------------------------------------------------------------------------------------------------------------------------------------------------------------------------------------------------------------------------------------------------------------------------------------------------------------------------------------------------------------------------------------------------------------------------------------------------------------------------------------------------------------------------------------------------------------------------------------------------------------------------------------------------------------|
| $F_o$            | Minimal fluorescence from a dark-adapted leaf                                                                                                                                                                                                                                                                                                                                                                                                                                                                                                                                                                                                                                                                                                                                                                                              |
| $F_m$            | Maximal fluorescence from a dark-adapted leaf                                                                                                                                                                                                                                                                                                                                                                                                                                                                                                                                                                                                                                                                                                                                                                                              |
| $F_v$            | Maximal variable fluorescence from a dark-adapted leaf. $F_v = F_m - F_o$                                                                                                                                                                                                                                                                                                                                                                                                                                                                                                                                                                                                                                                                                                                                                                  |
| $V_J$            | Relative variable fluorescence at 3 ms. $V_J = (F_{2\text{ ms}} - F_o)/(F_m - F_o)$                                                                                                                                                                                                                                                                                                                                                                                                                                                                                                                                                                                                                                                                                                                                                        |
| $V_I$            | Relative variable fluorescence at 30 ms. $V_I = (F_{30\text{ ms}} - F_o) / (F_m - F_o)$                                                                                                                                                                                                                                                                                                                                                                                                                                                                                                                                                                                                                                                                                                                                                    |
| $\phi P_o$       | $F_v/F_m = [F_m - F_o]/F_m = 1 - F_o/F_m =$ maximum quantum yield of PSII primary photochemistry (at $t = 0$ ), measured in samples in dark-adapted state. $F_o/F_m$ expresses the probability that an absorbed photon will be trapped by the PSII reaction centre.                                                                                                                                                                                                                                                                                                                                                                                                                                                                                                                                                                        |
| $\phi E_o$       | $(1 - F_o/F_m)(1 - V_J) =$ Quantum yield of electron transport (at $t = 0$ ).                                                                                                                                                                                                                                                                                                                                                                                                                                                                                                                                                                                                                                                                                                                                                              |
| $\phi R_o$       | $(1 - F_o/F_m)(1 - V_I) =$ Quantum yield for reduction of end electron acceptors at the PSI acceptor side.                                                                                                                                                                                                                                                                                                                                                                                                                                                                                                                                                                                                                                                                                                                                 |
| $\phi D_o$       | $F_o/F_m =$ Quantum yield (at $t = 0$ ) of energy dissipation                                                                                                                                                                                                                                                                                                                                                                                                                                                                                                                                                                                                                                                                                                                                                                              |
| $\Psi E_o$       | $1 - V_J = 1 - (F_{2\text{ ms}} - F_o)/(F_m - F_o)$ . $\Psi E_o$ expresses the probability that the energy of a trapped excitation is used for electron transport beyond plastoquinone-A.                                                                                                                                                                                                                                                                                                                                                                                                                                                                                                                                                                                                                                                  |
| $\delta R_o$     | $(1 - V_I)/(1 - V_J) =$ Efficiency with which an electron from the intersystem electron carriers moves to reduce end electron acceptors at the PSI acceptor side.                                                                                                                                                                                                                                                                                                                                                                                                                                                                                                                                                                                                                                                                          |
| $\Delta V_{I-P}$ | $1 - V_I = (F_m - F_{30\text{ ms}}) / (F_m - F_o)$ , I-P phase. This parameter indicates relative contribution of the I-P phase to the fluorescence transient OJIP; it is regarded as a measure of the efficiency of electron flux through PSI to reduce the final acceptors of the electron transport chain, i.e., ferredoxin and NADP.                                                                                                                                                                                                                                                                                                                                                                                                                                                                                                   |
| ABS/RC           | $(1 - \text{Chl}_{RC}/\text{Chl}_{tot})/(\text{Chl}_{RC}/\text{Chl}_{tot}) =$ Absorption flux (of antenna chlorophylls) per reaction centre (RC).                                                                                                                                                                                                                                                                                                                                                                                                                                                                                                                                                                                                                                                                                          |
| $PI_{ABS}$       | $(RC/ABS) \times [\phi P_o / (1 - \phi P_o)] \times [\Psi E_o / (1 - \Psi E_o)]$ . Performance index on absorption bases; absorption of antenna Chls of PSII. This measure incorporates photochemical and non-photochemical processes, such as absorption and trapping of excitation energy, electron transport beyond the plastoquinone-A and dissipation of excess excitation energy.                                                                                                                                                                                                                                                                                                                                                                                                                                                    |
| $PI_{TOT}$       | Performance Index total ( $PI_{TOT}$ ) is the potential for energy conservation from photons absorbed by PSII to the reduction flux (RE) of PSI end acceptors. The $PI_{tot}$ is a multi-parametric indicator of four measures of photosynthetic electron transport: (1) the concentration of reaction centres; (2) the quantum yield of PSII photochemistry; (3) the capacity for uptake of electrons in the electron chain between PSII and PSI; (4) the efficiency with which an electron can transfer from the reduced intersystem electron acceptors to the PSI end electron [1,2].<br>$PI_{TOT} = PI_{ABS} [\delta R_o / (1 - \delta R_o)]$<br>where $\delta R_o = (1 - V_I)/(1 - V_J) = (F_m - F_I) / (F_m - F_J)$ .<br>$\delta R_o$ is the efficiency of an electron can transport from a reduced PQ to PSI end electron acceptor. |

|                          |                                                                                                                                                                                                                                                                                                                                                         |
|--------------------------|---------------------------------------------------------------------------------------------------------------------------------------------------------------------------------------------------------------------------------------------------------------------------------------------------------------------------------------------------------|
| <b>TR<sub>o</sub>/RC</b> | $M_o(1/V_j)$ = Trapping flux (leading to plastoquinone-A reduction) per RC.                                                                                                                                                                                                                                                                             |
| <b>ET<sub>o</sub>/RC</b> | $M_o(1/V_j)\Psi_o$ = Electron transport flux (further than plastoquinone-A) per RC.                                                                                                                                                                                                                                                                     |
| <b>RC/CS<sub>o</sub></b> | $F_o \varphi P_o (V_j/M_o)$ = Density of RCs (plastoquinone-A reducing PSII reaction centers).                                                                                                                                                                                                                                                          |
| <b>DI<sub>o</sub>/RC</b> | $(ABS/RC - TR_o/RC)$ = Dissipated energy flux per RC.                                                                                                                                                                                                                                                                                                   |
| <b>M<sub>o</sub></b>     | Slope of the curve at the origin of the fluorescence rise. It is a measure of the rate of the primary photochemistry. $M_o = 4 \times (F_{300 \mu s} - F_o) / (F_m - F_o)$                                                                                                                                                                              |
| <b>ChlF steps</b>        | The <i>ChlF</i> induction phase has different time steps called as: 20–50 $\mu$ s (O-step), 2 ms (J-step), 30 ms (I-step), around 0.8 s (P-step; peak) and generally denoted F <sub>o</sub> , F <sub>J</sub> and F <sub>I</sub> . The last step (P-step) indicates the highest fluorescence intensity (F <sub>m</sub> ), when saturating light is used. |

## References

1. Strasser, R.J.; Tsimilli-Michael, M.; Srivastava, A. Analysis of the chlorophyll a fluorescence transient. In *Chlorophyll a Fluorescence*; Papageorgiou, G., Govindjee, F.C., Gantt, E., Golbeck, J., Golden, S., Eds.; Springer: Dordrecht, The Netherlands, 2004; pp. 321–362.
2. Strasser, R.J.; Tsimilli-Michael, M.; Qiang S.; Goltsev, V. Simultaneous in vivo recording of prompt and delayed fluorescence and 820-nm reflection changes during drying and after rehydration of the resurrection plant *Haberlea rhodopensis*. *Biochim. Biophys. Acta (BBA) Bioenergy*. **2010**, *1797*, 1313–1326.
